# Supplementary material for: Laughlin anyon complexes with Bose properties
Source: Research Square preprint supplement (doi:10.21203/rs.3.rs-495107/v1), 2021-05-20
Supplement: Supplementary file 1 [file 9a55054b450e92e1e329e4db.docx]

**Theoretical model**

In two-dimensional electron systems with relatively weak Coulomb interaction the ground state of fractional quantum Hall effect with is adequately modeled by a partially filled lowest. Landau level. Neutral spin excitations of such system can, nevertheless, combine spin waves and charge excitations within lowest Landau level. Single-particle contribution of such excitations consists only of Zeeman energy, and many-particle one is a combination of exchange and correlation energies, their magnitude is Considering the complex structure of correlations in fractional quantum Hall states, the behaviour of many-particle energy as a function of momentum is troublesome to be described analytically, which is why the method of exact diagonalization of energy spectrum for finite number of electrons was used. For calculating the energies of collective spin excitations, the states on Landau levels with both spin projections were considered.

Many-body states of electrons on Landau levels were considered within torus geometry in a perpendicular quantizing magnetic field1. Periodic boundary conditions were chosen as a rectangular elementary cell with dimentions . It produces a discrete set of wave vectors, satisfying the relations: and , where Using dimension ratio allows

to acquire more dots, while this slight asymmetry does not contribute to the physical properties of the system.

In our model the Hamiltonian matrices in Hilbert space of many-body states corresponding to different values of full spin and momentum of the system were constructed to calculate the spectrum of collective excitations with the lowest. energy. Matrix elements were taken in the following form4:

with being associated Laguerre polynomials. The modelling was conducted for the following parameters of two-dimensional electronic system in GaAs: The calculation of matrix elements was made considering the geometric weakening of Coulomb interaction3. It was realized via introducing the geometrical form-factor into the two-dimensional Fourier component of Coulomb potential The function was calculated using the profile of the envelope wave function of electrons in the lowest dimensional quantization subband of the conduction band. This function was calculated numerically for the actual parameters of the experimental sample and then approximated by the expression:
It is well known that the calculation of the ground state parameters by the exact diagonalization provides an excellent convergence already for electron numbers (ref.1). However in this work the calculations are focused on spin-flip excitations at nonzero wave vectors, therefore we had to take into account the states with both spin projections, and also to expand the actual range of momenta in the magnetic Brillouin zone. In order to establish the magneto-roton minimum of at momenta , we had to use a significant number of electrons up to and corresponding Landau level capacity As a result, the shortest dimension of the 1st magnetic Brillouin zone reached values , for sure overlapping the magnetoroton position. Furthermore, the dispersion data are calculated with an excellent detalization, capable to draw the magnetoroton minimum smoothly. The dispersions of excitations for are also given on fig. XX for comparison, showing the convergence of the results of numerical simulations.

**References**
1. F.D.M.Haldane, Phys.Rev.Lett.55, 2095 (1985).

2. D.Yoshioka, Surface Science170, 125-128 (1986).

3. A. B. Vankov, L. V. Kulik, I. V. Kukushkin, V. E. Kirpichev, S. Dickmann,V. M. Zhilin, J. H. Smet, K. von Klitzing, and W. Wegscheider, Phys. Rev.Lett.97, 246801 (2006).

4. Wenchen Luo and Tapash Chakraborty, Missing fractional quantum Hall states in ZnO, Phys. Rev. B 93, 161103(R) (2016) – Published 6 April 2016

**Optical transitions in the 18nm quantum well**

Following3 we start from the Luttinger Hamiltonian1 with an external magnetic field parallel to the axis, neglecting terms linear in the quasimomentum2:

(1)

where:

In this case, the wave function vector has the following form (the subscripts denote projections of the spin on the axis):

(2)

When an external magnetic field is applied along the axis direction, the components of the quasimomentum in the plane are no longer commute:
, where is the magnetic length. Let us introduce the following ladder operators:

They satisfy relations:

The operator has cigenvalues The corresponding eigenfunctions are denoted as These functions satisfy the following relations:

(3)

One may rewrite the Hamiltonian (1) in terms of the ladder operators introduced above, neglecting the anisotropic term in (that contains ). As was shown in ref.3, including the anisotropic terms leads to the appearance of anticrossing of Landau levels with numbers that differ by 4. Using the relation , one can rewrite the Hamiltonian (1) in the following form:

(4)

where we have introduced the notation

Here, and are doubled effective masses of heavy and light holes. We will seek the solution in the form

(5)

where are functions of the coordinates in the plane corresponding to the Landau level with number (eigenfunctions of the operator , and are functions of that correspond to the various spin projections. Using (3) we rewrite the Hamiltonian (4) in the form of a matrix that acts on the columns of the functions :

(6)

where we have substitute and used the notation

This second order differential operator is mapped onto the system of first order differential equations. The easiest method of treating the first derivatives as unknown functions, is somewhat inconvenient here since these functions are not continuous at the boundary between the GaAs quantum well and the AlGaAs barrier. In order to satisfy the requirement of continuity, we construct. new unknown functions by acting on the vector with the velocity operator The continuity of the functions is a consequence of the particles number conservation. Substituting the Hamiltonian of the form

into the velocity operator, one obtains by analogy with ref.4:

(7)

Now we can write the complete system of the first-order differential equations for the functions and The first four equations are obtained directly from (7), while the next four are obtained by differentiating the first four and substituting the expressions obtained for the second derivatives into the original Hamiltonian operator (6):

(8)

where ϵ is the energy eigenvalue and is the electrostatic potential that should be obtained by solving Poisson equation in direction for electrons populating the quantum well.

The integral of the wave functions is used as yet another unknown function that satisfy equation . The last differential equation is introduced for the eigenvalue ϵ. Thus one obtains the remaining two equations:

(9)

In order to solve the system of the first order non-linear differential equations like numerically we use relaxation method illustrated below. Let us consider the first order differential equation in the generic form:

(10)

where is an -component solution vector defined on the axis. Let us further pick out equally spaced points at a distance from one another within the definition range. Then one can approximate (10) by an equivalent system of finite difference equations for the values of at the grid points :
. These equations are

(11)

Here and are vectors representing original equations sampled as grid points.

The general method of solving such non-linear system of equations consists of applying so called Newton iterations starting from some initial approximation based on analytical solution of some trivial case, for. ex. zero magnetic field and quantum well with infinite boundary potential. Let us define an error vector after the s-th iteration. Then the next solution vector can be written as

(12)

The Jacobi matrix for this problem is block-diagonal with most. off-diagonal elements equal to zero. We use well known algorithms (see ref.5) to invert it efficiently. By recursively applying (12) one can obtain the solution of (10) with desired precision. The transformation from simplified initial approximation to the one having desired physical parameters (for. ex. non-zero magnetic field) should be performed in small steps iteratively solving the equations using previous step results as initial approximation for the next iteration.

**References**
1. J. M. Luttinger, Phys. Rev. 102,1030(1956).
2. D. A. Broido and L. J. Sham, Phys. Rev. B 31,888(1985).
3. S.-R. Eric Yang, D. A. Broido, and L. J. Sham, Phys. Rev. B 32,6630(1985).
4. R. Eppenga, M. F. H. Schuurmans, and S. Golak, Phys. Rev. B 36,1554 (1987).
5. W. H. Press, S. A. Teukolsky, W. T. Vetterling, and B. P. Flannery, Numerical Recipes in C, Second Edition, Cambridge Univ. Press, 2002.


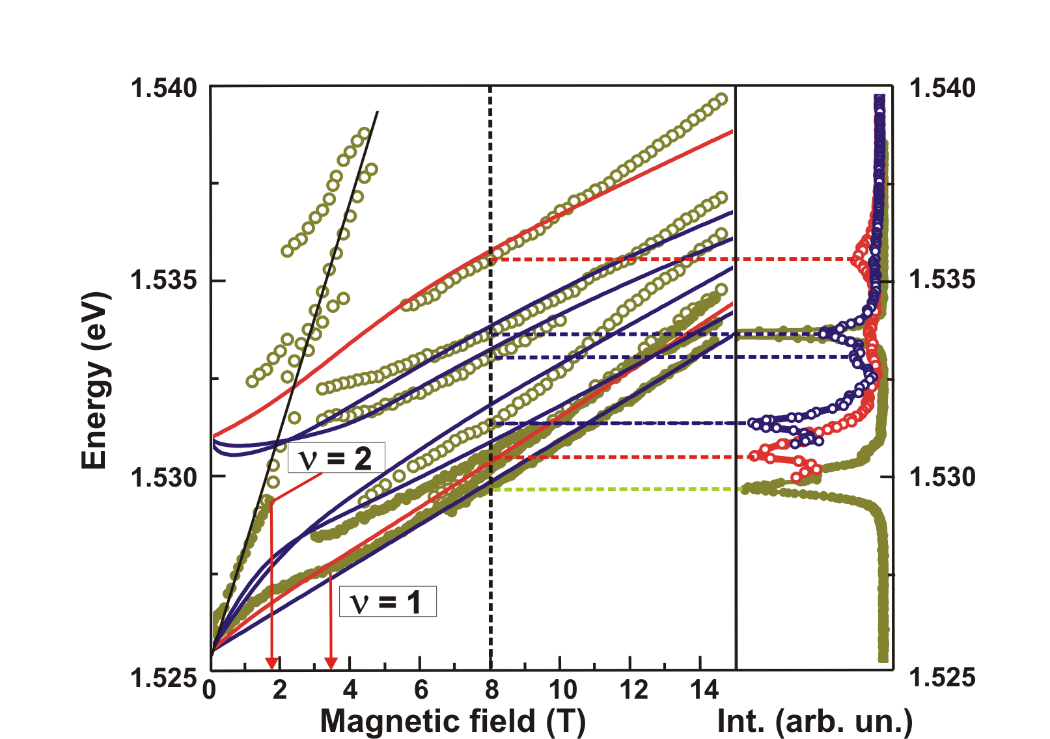


Fig. Left, the optical transition energies obtained from photoexcitation spectra (open dots) and photoluminescence (solid dots). The electron density obtained from the optical spectra well agree with the transport data. Blue and rad solid lines show the calculated transition energies in two polarizations of incident photons σ- and σ+, correspondingly. Right, photoexcitation spectra in σ- and σ+ polarizations (open dots) and photoluminescence (solid dots).
